# Supplementary material
Source: PubMed Central journal article supplement (PMC4719455)
Supplement: JB.00711-15_zjb999093895so1.pdf [file JB.00711-15_zjb999093895so1.pdf]

| <b>Primer</b>          | <b>Sequence (5'-3')</b>                                 |
|------------------------|---------------------------------------------------------|
| <i>hfq_wt_1b</i>       | GCAAATATCGGAAAGCGTCAGGC                                 |
| <i>hfq_wt_2</i>        | ATCGCGAGCTGGCTGCTGATCG                                  |
| <i>hfq_3x_FLAG_1</i>   | GTCATCGTCATCCTTGATGTCG                                  |
| b                      |                                                         |
| <i>hfq-Up-FLAG-For</i> | GCGGATCCGGCATCAATGGTGATGACTGG                           |
| <i>hfq-Up-FLAG-Rev</i> | ATCTTTATAATCACCGTCATGGTCTTTGTAGTCGGCTTCCTCGCCTTCAAACATC |
| <i>hfq-Dn-FLAG-For</i> | CATGACATCGACTACAAGGATGACGATGACAAGTGACGCTTCCGATATTTGCCG  |
| <i>hfq-Dn-FLAG-Rev</i> | GCCTGCAGGGTCGGATCGAGCGTGCGAA                            |
| BSnc115_F              | CTGGCTGTTGAGGCTTATGGG                                   |
| BSnc115_R              | TTTCCCGCTCTGCGCTGGCC                                    |
| BSnc118_F              | AACCGTTGGTTTCACGCGGTG                                   |
| BSnc118_R              | AAGCAAGGCTTTCGCCCTGCC                                   |
| BSnc140_F              | GCACCAGACCTTGGGCGTGG                                    |
| BSnc140_R              | GTCCGGCTCTCATTCCCTGC                                    |
| BSnc118-North          | TCCATCCTCCCAAGACTTCACCGCGTGA                            |
| BSnc119-North          | TAGGTGACTGGCTCGGAGGTCAATAG                              |
| BSnc120-North          | TTTTTAGCGCGTCGTTCCCTCG                                  |
| BSnc121-North          | CTCGATGCCCATTCATATGGCTCTGCC                             |
| BSnc135-North          | GTCAAACAGAGTGGCTAAACCACTCGGTAA                          |
| BSnc149-North          | TTCACGAGTTAAAATGGATGGGCAA                               |
| BSnc150-North          | CTTTGGCCGGCGCTTATGTGGT                                  |
| BSnc159-North          | CCGAGACAGGACTTCCAACGTGC                                 |

**Table S1. Primers used in this study**

| Genes<br>(EC>4) | name        | Chromosome | Annotation                                                      | ID          |
|-----------------|-------------|------------|-----------------------------------------------------------------|-------------|
| BR0122          |             | I          | hypothetical protein                                            | NP_697163.1 |
| BR0278          | <i>dhT</i>  | I          | phenylhydantoinase                                              | NP_697312.1 |
| BR0279          |             | I          | allantoate amidohydrolase                                       | NP_697313.1 |
| BR0283          |             | I          | oxidoreductase                                                  | NP_697317.1 |
| BR0389          |             | I          | hypothetical protein                                            | NP_697420.1 |
| BR0410          |             | I          | hypothetical protein                                            | NP_697441.1 |
| BR0440          |             | I          | hypothetical protein                                            | NP_697468.1 |
| BR0642          |             | I          | hypothetical protein                                            | NP_697656.1 |
| BR0662          |             | I          | hypothetical protein                                            | NP_697676.1 |
| BR0856          |             | I          | hypothetical protein                                            | NP_697870.1 |
| BR0941          |             | I          | hypothetical protein                                            | NP_697952.1 |
| BR1037          |             | I          | hypothetical protein                                            | NP_698043.1 |
| BR1155          |             | I          | hypothetical protein                                            | NP_698160.1 |
| BR1170          | <i>clpS</i> | I          | ATP-dependent Clp protease<br>adaptor protein ClpS              | NP_698175.1 |
| BR1354          |             | I          | hypothetical protein                                            | NP_698353.1 |
| BR1386          |             | I          | hypothetical protein                                            | NP_698384.1 |
| BR1443          |             | I          | transglycosylase SLT domain-<br>containing protein              | NP_698441.1 |
| BR1457          |             | I          | hypothetical protein                                            | NP_698453.1 |
| BR1496          |             | I          | hypothetical protein                                            | NP_698492.1 |
| BR1498          |             | I          | LysR family transcriptional<br>regulator                        | NP_698494.1 |
| BR1765          |             | I          | hypothetical protein                                            | NP_698749.1 |
| BR1819          |             | I          | hypothetical protein                                            | NP_698799.1 |
| BR1850          | <i>rplU</i> | I          | 50S ribosomal protein L21                                       | NP_698830.1 |
| BR1854          |             | I          | hypothetical protein                                            | NP_698834.1 |
| BR1865          |             | I          | hypothetical protein                                            | NP_698845.1 |
| BR2019          |             | I          | hypothetical protein                                            | NP_698994.1 |
| BRA0010         |             | II         | Bmp family lipoprotein                                          | NP_699217.1 |
| BRA0047         |             | II         | hypothetical protein                                            | NP_699254.1 |
| BRA0062         |             | II         | type IV secretion system<br>protein VirB8                       | NP_699269.1 |
| BRA0130         |             | II         | hypothetical protein                                            | NP_699333.1 |
| BRA0174         | <i>cycA</i> | II         | cytochrome c2                                                   | NP_699376.1 |
| BRA0276         | <i>nosD</i> | II         | copper ABC transporter<br>periplasmic copper-binding<br>protein | NP_699472.1 |
| BRA0287         |             | II         | hypothetical protein                                            | NP_699482.1 |
| BRA0304         |             | II         | sugar ABC transporter<br>periplasmic sugar-binding<br>protein   | NP_699499.1 |
| BRA0326         |             | II         | Spermidine/putrescine ABC                                       | NP_699521.1 |

|         |             |    |                               |             |             |
|---------|-------------|----|-------------------------------|-------------|-------------|
|         |             |    | transporter                   | periplasmic |             |
|         |             |    | spermidine/putrescine-binding |             |             |
|         |             |    | protein                       |             |             |
| BRA0330 |             | II | hypothetical protein          |             | NP_699525.1 |
| BRA0340 |             | II | glutaminase                   |             | NP_699533.1 |
| BRA0415 |             | II | LuxR family transcriptional   |             | NP_699606.1 |
|         |             |    | regulator                     |             |             |
| BRA0458 |             | II | hypothetical protein          |             | NP_699647.1 |
| BRA0498 |             | II | hypothetical protein          |             | NP_699685.1 |
| BRA0515 |             | II | hypothetical protein          |             | NP_699702.1 |
| BRA0546 |             | II | hypothetical protein          |             | NP_699733.1 |
| BRA0570 |             | II | ABC transporter ATP-binding   |             | NP_699754.1 |
|         |             |    | protein                       |             |             |
| BRA0603 |             | II | hypothetical protein          |             | NP_699787.1 |
| BRA0631 |             | II | amino acid ABC transporter    |             | NP_699815.1 |
|         |             |    | substrate-binding protein     |             |             |
| BRA0641 | <i>pobA</i> | II | 4-hydroxybenzoate             | 3-          | NP_699825.1 |
|         |             |    | monooxygenase                 |             |             |
| BRA0731 |             | II | hypothetical protein          |             | NP_699908.1 |
| BRA0741 |             | II | hypothetical protein          |             | NP_699918.1 |
| BRA0746 |             | II | short                         | chain       | NP_699923.1 |
|         |             |    | dehydrogenase/reductase       |             |             |
|         |             |    | oxidoreductase                |             |             |
| BRA0747 |             | II | hypothetical protein          |             | NP_699924.1 |
| BRA0807 |             | II | ABC transporter permease      |             | NP_699980.1 |
| BRA0939 | <i>dgoK</i> | II | 2-dehydro-3-                  |             | NP_700106.1 |
|         |             |    | deoxygalactonokinase          |             |             |
| BRA1018 |             | II | hypothetical protein          |             | NP_700181.1 |
| BRA1020 |             | II | hypothetical protein          |             | NP_700183.1 |
| BRA1021 |             | II | 50S ribosomal protein L34     |             | NP_700184.1 |
| BRA1081 |             | II | peptide ABC transporter       |             | NP_700243.1 |
|         |             |    | permease                      |             |             |
| BRA1090 |             | II | peptide ABC transporter       |             | NP_700250.1 |
|         |             |    | substrate-binding protein     |             |             |
| BRA1096 |             | II | transcriptional regulator     |             | NP_700255.1 |
| BRA1097 |             | II | oligopeptide ABC transporter  |             | NP_700256.1 |
|         |             |    | periplasmic oligopeptide-     |             |             |
|         |             |    | binding                       |             |             |
|         |             |    | protein                       |             |             |
| BRA1112 |             | II | hypothetical protein          |             | NP_700268.1 |
| BRA1164 |             | II | hypothetical protein          |             | NP_700317.1 |
| BRA1173 |             | II | branched-chain amino acid ABC |             | NP_700326.1 |
|         |             |    | transporter periplasmic amino |             |             |
|         |             |    | acid-binding protein          |             |             |

---

| Genes<br>(EF>3,but<br><4) | name        | Chromosome | Annotation                                                       | ID          |
|---------------------------|-------------|------------|------------------------------------------------------------------|-------------|
| BR0988                    |             | I          | hypothetical protein                                             | NP_697996.1 |
| BR0942                    |             | I          | heavy metal-binding domain-<br>containing protein                | NP_697953.1 |
| BR0136                    |             | I          | hypothetical protein                                             | NP_697175.1 |
| BR0521                    |             | I          | perosamine synthase                                              | NP_697543.1 |
| BR1669                    |             | I          | hypothetical protein                                             | NP_698655.1 |
| BR1973                    |             | I          | 6-pyruvoyl tetrahydrobiopterin<br>synthase                       | NP_698948.1 |
| BR1866                    |             | I          | hypothetical protein                                             | NP_698846.1 |
| BR1898                    | <i>tesB</i> | I          | acyl-CoA thioesterase                                            | NP_698876.1 |
| BR0514                    |             | I          | transposase, interruption-C                                      | YP_089630.1 |
| BR1858                    |             | I          | hypothetical protein                                             | NP_698838.1 |
| BR0499                    |             | I          | glyoxalase                                                       | NP_697527.1 |
| BR0230                    | <i>soxD</i> | I          | sarcosine oxidase subunit delta                                  | NP_697264.1 |
| BR1505                    |             | I          | hypothetical protein                                             | NP_698501.1 |
| BR0742                    |             | I          | hypothetical protein                                             | NP_697756.1 |
| BR0164                    |             | I          | hypothetical protein                                             | NP_697202.1 |
| BR1486                    |             | I          | hypothetical protein                                             | NP_698482.1 |
| BR1617                    |             | I          | hypothetical protein                                             | NP_698607.1 |
| BR0820                    |             | I          | hypothetical protein                                             | NP_697834.1 |
| BR1635                    |             | I          | hypothetical protein                                             | NP_698623.1 |
| BR0798                    |             | I          | hypothetical protein                                             | NP_697812.1 |
| BR0595                    |             | I          | hypothetical protein                                             | NP_697611.1 |
| BR1379                    |             | I          | hypothetical protein                                             | NP_698377.1 |
| BR1312                    |             | I          | hypothetical protein                                             | NP_698315.1 |
| BRA0344                   |             | II         | diguanylate phosphodiesterase                                    | NP_699537.1 |
| BRA0652                   |             | II         | branched-chain amino acid ABC<br>transporter ATP-binding protein | NP_699836.1 |
| BRA0414                   |             | II         | Crp/Fnr family transcriptional<br>regulator                      | NP_699605.1 |
| BRA1029                   |             | II         | hypothetical protein                                             | NP_700192.1 |
| BRA0461                   |             | II         | hypothetical protein                                             | NP_699650.1 |
| BRA0981                   |             | II         | 2-deoxy-D-gluconate 3-<br>dehydrogenase                          | NP_700146.1 |
| BRA0331                   |             | II         | hypothetical protein                                             | NP_699526.1 |
| BRA0662                   |             | II         | hypothetical protein                                             | NP_699846.1 |
| BRA1093                   |             | II         | peptide ABC transporter<br>permease                              | NP_700253.1 |
| BRA0214                   |             | II         | hypothetical protein                                             | NP_699413.1 |
| BRA0821                   |             | II         | hypothetical protein                                             | NP_699991.1 |
| BRA0075                   |             | II         | SPFH domain-containing<br>protein/band 7 family protein          | NP_699282.1 |

|         |               |    |                                          |             |
|---------|---------------|----|------------------------------------------|-------------|
| BRA0818 |               | II | camphor resistance protein<br>CrcB       | NP_699988.1 |
| BRA0925 |               | II | transcriptional regulator                | NP_700092.1 |
| BRA0250 |               | II | CbbQ/NirQ/NorQ/GpvN family<br>protein    | NP_699447.1 |
| BRA0561 |               | II | hypothetical protein                     | NP_699745.1 |
| BRA0993 | <i>RbsC-4</i> | II | ribose ABC transporter<br>permease       | NP_700157.1 |
| BRA0169 |               | II | hypothetical protein                     | NP_699371.1 |
| BRA0403 |               | II | Gfo/Idh/MocA family<br>oxidoreductase    | NP_699595.1 |
| BRA1032 |               | II | hypothetical protein                     | NP_700195.1 |
| BRA0480 |               | II | MarR family transcriptional<br>regulator | NP_699667.1 |
| BRA0859 | <i>RbsC-3</i> | II | ribose ABC transporter<br>permease       | NP_700027.1 |
| BRA0241 |               | II | hypothetical protein                     | NP_699438.1 |
| BRA1177 |               | II | hypothetical protein                     | NP_700330.1 |

**Table S2. Hfq enriched mRNA identified in this study**

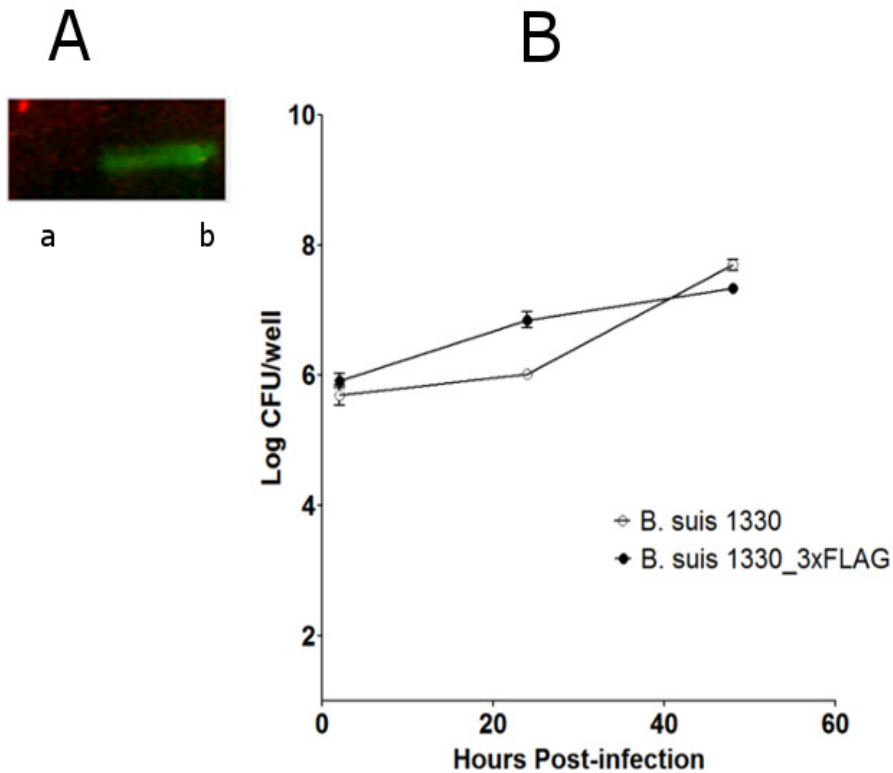

**Supplemental Figure S1 Expression of 3xFLAG-Hfq in *B. suis* 1330.**

(A) Western blot with anti-FLAG antibody showing *B. suis* 1330 wild type strain (left) and FLAG-tagged strain (right).

(B) Expressing 3xFLAG-Hfq does not affect *Brucella* virulence. Intracellular survival and multiplication of *B. suis* 1330 wild type and FLAG-tagged strains at 2, 24 and 48h post-infection in J774 macrophages infected with a MOI of 50.
